# Supplementary material
Source: PubMed Central journal article supplement (PMC2075435)
Supplement: jphysiol_2006.122754_1.pdf [file jphysiol_2006.122754_1.pdf]

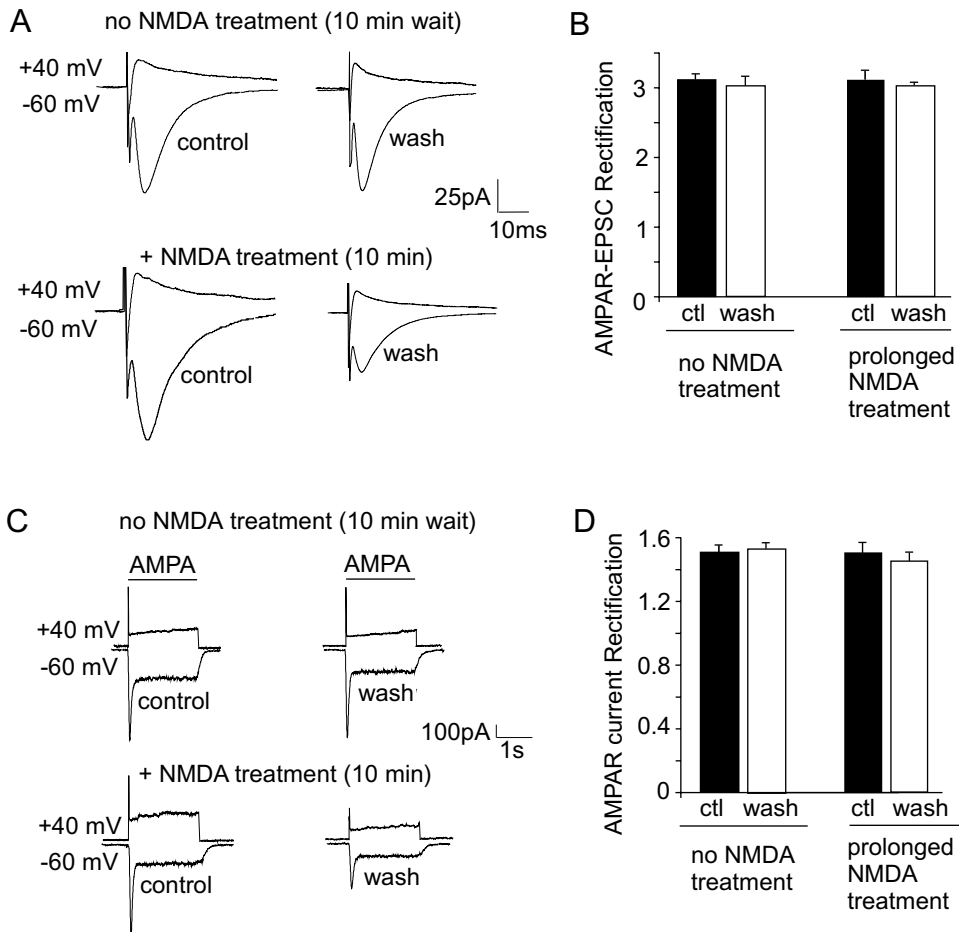

**Supplemental Figure 1. Prolonged NMDAR stimulation does not change AMPAR subunit composition as indicated by the unaltered rectification of AMPA responses (ratio of the AMPAR-mediated current amplitude at -60 mV to that at +40 mV).**
